# Supplementary material
Source: ML conference proceedings conference paper supplement (https://openreview.net/forum?id=TJHB4ySVZM)
Supplement: supplementary_material [file attachment]

000 SUPPLEMENTAL MATERIAL FOR: DATA EXTRAPOLA-  
001 TION FOR TEXT-TO-IMAGE GENERATION ON SMALL  
002 DATASETS  
003  
004  
005

006 **Anonymous authors**  
007 Paper under double-blind review  
008  
009

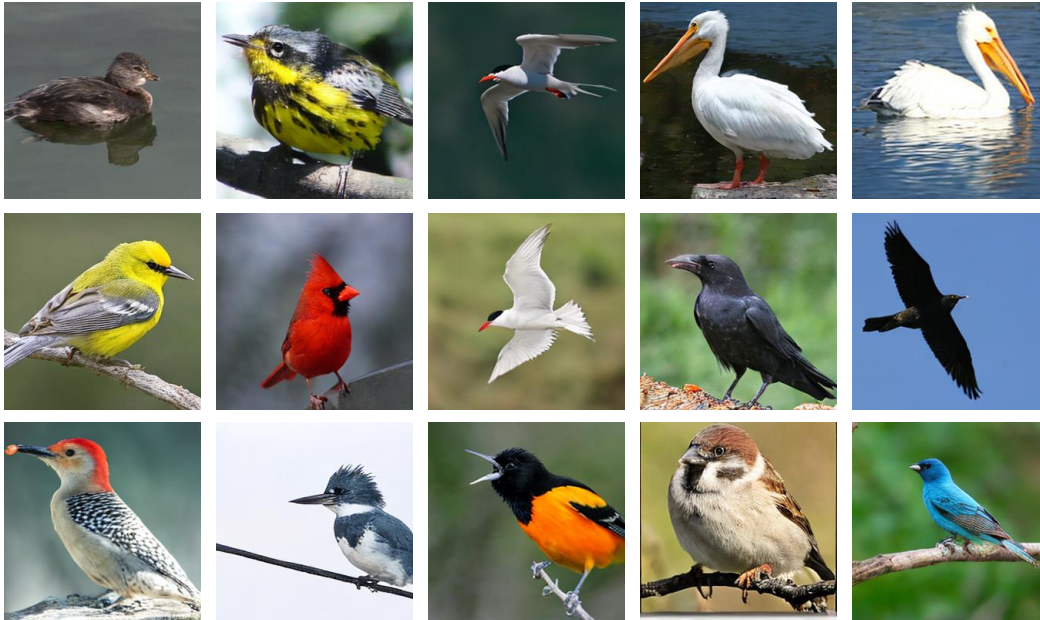

Figure 1: More generated images from the CUB dataset. The text descriptions are omitted for simplicity.

054  
055  
056  
057  
058  
059  
060  
061  
062  
063  
064  
065  
066  
067  
068  
069  
070  
071  
072  
073  
074  
075  
076  
077  
078  
079  
080  
081  
082  
083  
084  
085  
086  
087  
088  
089  
090  
091  
092  
093  
094  
095  
096  
097  
098  
099  
100  
101  
102  
103  
104  
105  
106  
107

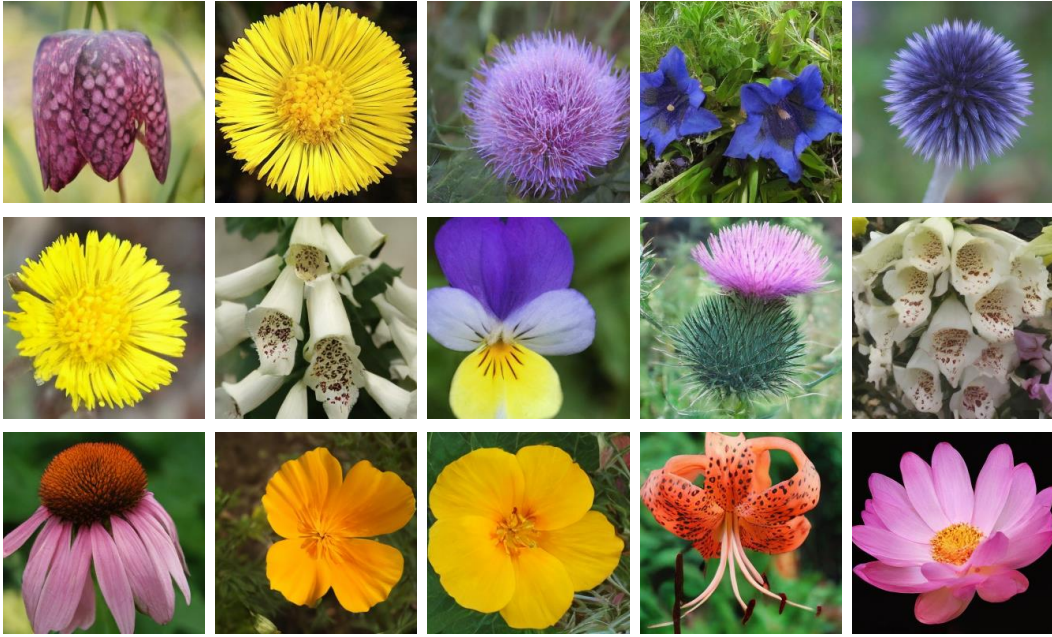

Figure 2: More generated images from the Oxford dataset. The text descriptions are omitted for simplicity.

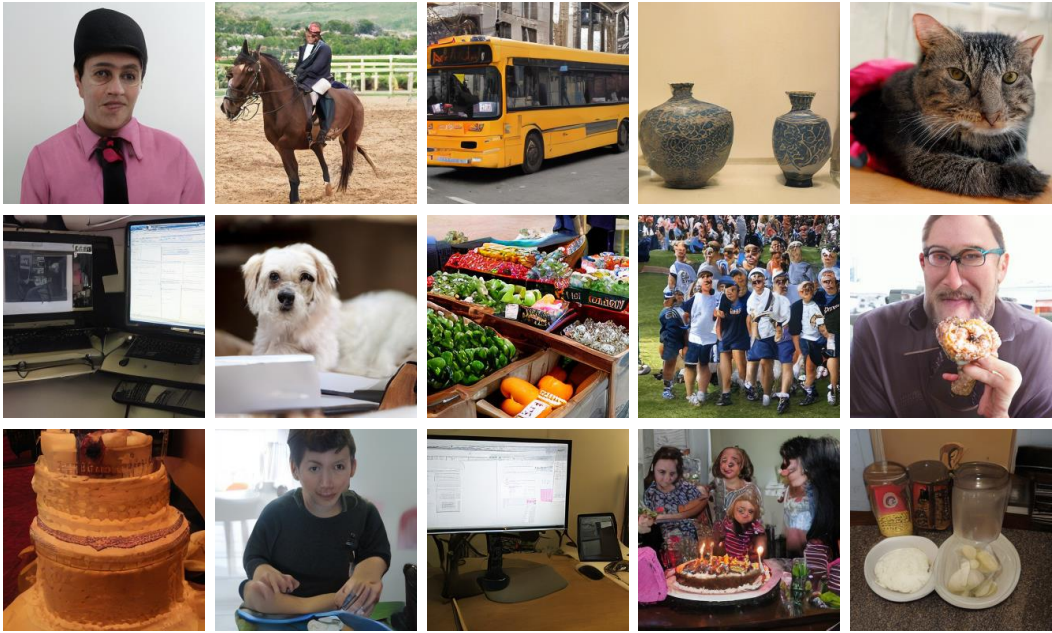

Figure 3: More generated images from the COCO dataset. The text descriptions are omitted for simplicity.
